# Supplementary material for: Immobilization of Ionic Liquid on a Covalent Organic Framework for Effectively Catalyzing Cycloaddition of CO2 to Epoxides
Source: MDPI journal article supplement (doi:10.3390/molecules27196204), 2022-09-21
Supplement: s1 [file s1]

# Supplementary Materials

## Immobilization of Ionic Liquid on a Covalent Organic Framework for Effectively Catalyzing Cycloaddition of CO<sub>2</sub> to Epoxides

Qianqian Yan <sup>1,†</sup>, Hao Liang <sup>1,†</sup>, Shenglin Wang <sup>1</sup>, Hui Hu <sup>1</sup>, Xiaofang Su <sup>1,\*</sup>, Songtao Xiao <sup>2,\*</sup>, Huanjun Xu <sup>3</sup>,  
Xuechao Jing <sup>4</sup>, Fei Lu <sup>1</sup> and Yanan Gao <sup>1,\*</sup>

1 Key Laboratory of Ministry of Education for Advanced Materials in Tropical Island Resources, Hainan University, No. 58, Renmin Avenue, Haikou 570228, China

2 China Institute of Atomic Energy, Beijing 102413, China

3 School of Science, Qiongtai Normal University, Haikou 571127, China

4 Liaocheng Luxi Polycarbonate Co., Ltd., Liaocheng 252000, China

\* Correspondence: sxf@hainanu.edu.cn (X.S.);  
xiao200112@163.com (S.X.); ygao@hainanu.edu.cn (Y.G.)

† These authors contributed equally to this work.

## Synthesis of 4,4',4'',4'''-(Pyrene-1,3,6,8-tetrayl) tetraaniline (PyTTA)

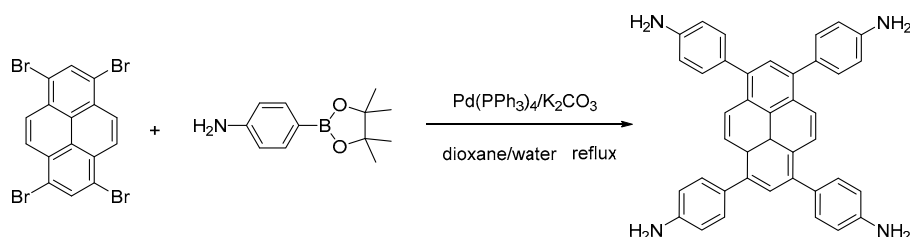

PyTTA was synthesized according to a literature method with modification [54]. To a 250 mL three-necked round flask were added 1,3,6,8-tetrabromopyrene (1.48 g, 2.86 mmol), 4-(4,4,5,5-tetramethyl-1,3,2-dioxaborolan-2-yl)aniline (3.01 g, 13.7 mmol), palladium tetrakis(triphenylphosphine) (0.33 g, 0.29 mmol), and potassium carbonate (2.18 g, 15.7 mmol). The air in the flask was slowly removed by  $\text{N}_2$  flow and a mixture of dioxane (32 mL) and  $\text{H}_2\text{O}$  (8 mL) was added to the flask. The reaction was stirred under reflux (115 °C) under  $\text{N}_2$  protection for 3 days. After cooling to room temperature, 25 mL water was added to the system and the solid was collected by filtration, and washed thoroughly with  $\text{H}_2\text{O}$  until the filtrate was colorless. The obtained solid was further washed thoroughly with methanol to afford PyTTA in 74% yield.  $^1\text{H}$  NMR (400 MHz, DMSO)  $\delta$  8.14 (s, 4H), 7.80 (s, 2H), 7.35 (d,  $J = 8.3$  Hz, 8H), 6.78 (d,  $J = 8.4$  Hz, 8H), 5.32 (s, 8H).

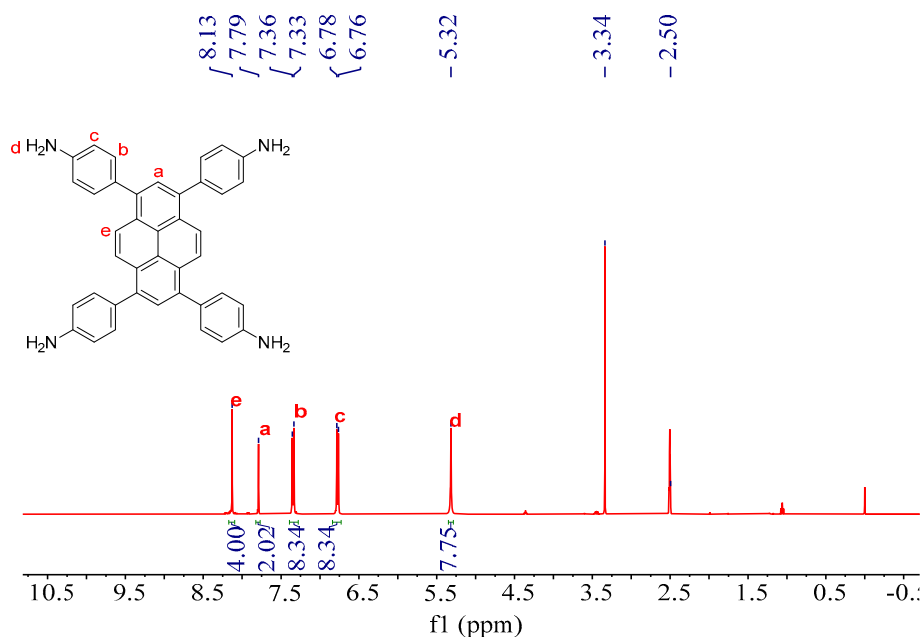

## Synthesis of 5,6-bis(4-formylbenzyl)-1-methyl-1H-benzimidazole (IM)

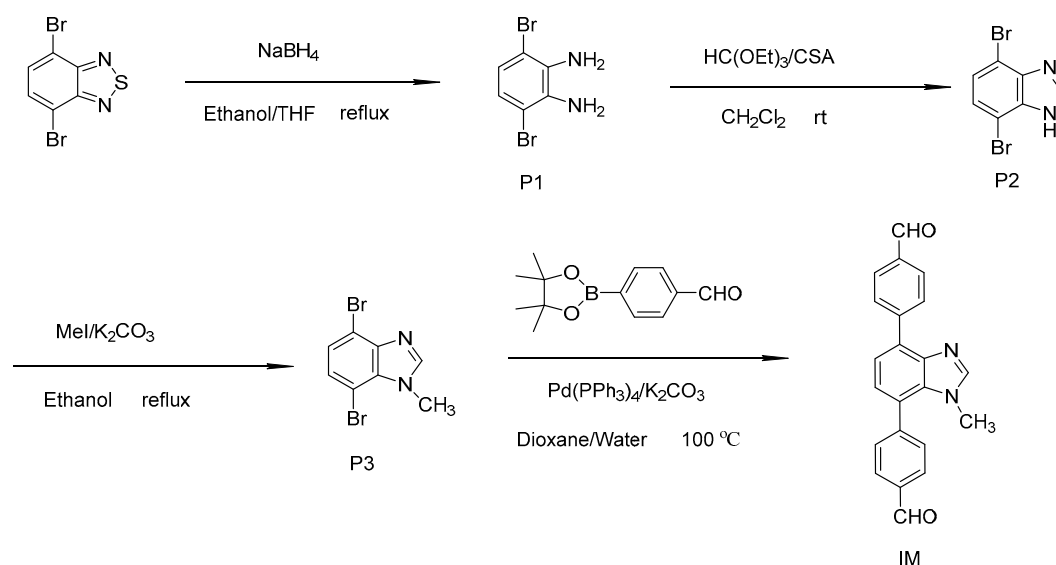

**4,5-Dibromo-1,2-benzenediamine. (P1).** To a 500 mL two-neck round-bottom flask were added 4,7-dibromobenzothiadiazole (3.5 g, 11.9 mmol), anhydrous THF (40 mL) and anhydrous EtOH (400 mL) under  $\text{N}_2$  protection. The mixture was cooled down to  $0\text{ }^\circ\text{C}$  with vigorous stirring.  $\text{NaBH}_4$  (2.65 g, 70 mmol for each portion) was added three times (total 8.0 g) every hour. (Be careful! Add slowly. Exothermic nature of the reaction tends to cause bumping. Gas evolution was also observed.) After consumption of 4,7-dibromobenzothiadiazole was confirmed by TLC analysis, the temperature of the mixture was cooled to  $0\text{ }^\circ\text{C}$ . After slow addition of water (100 mL) and vigorous stirring for 10 min, gummy precipitate was filtered off using Celite. Organic solvent was evaporated and product was extracted with dichloromethane three times. Combined organic layer was washed with water and brine and dried over  $\text{MgSO}_4$ . The extract was filtered off, evaporated, and the crude mixture was purified with short pad silica gel chromatography (eluent: hexane/acetone = 5/1). Combined solution was evaporated to give **P1** as an orange solid in 86.3% yield.

$^1\text{H}$  NMR (400 MHz,  $\text{CDCl}_3$ )  $\delta$  6.85 (s, 2H), 3.74 (s, 4H).

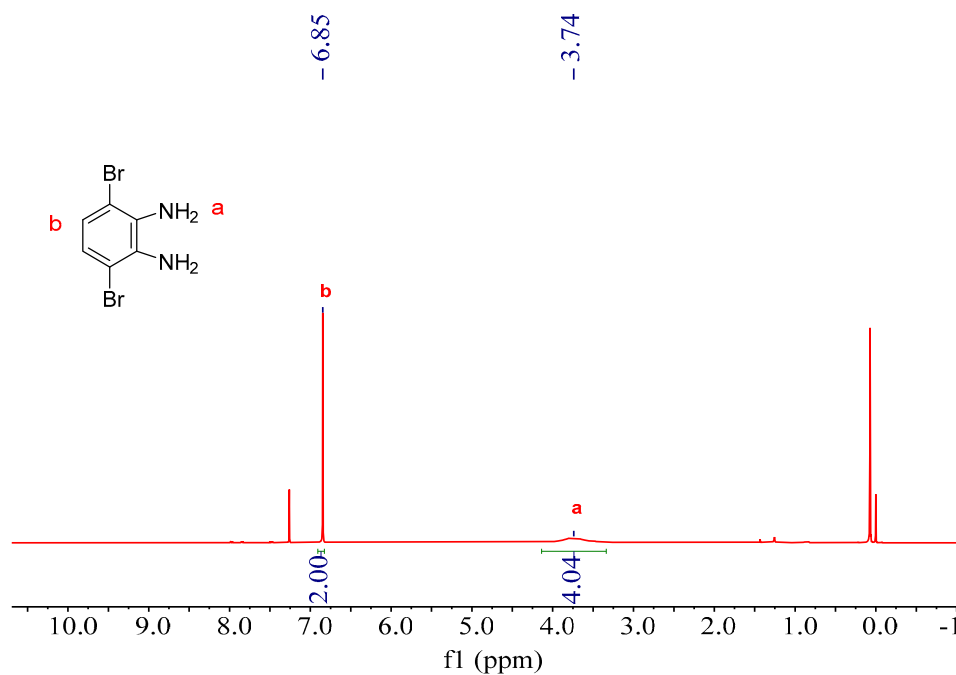

**5,6-Dibromobenzimidazole (P2).** The newly prepared diamine **P1** (2.16g, 8.11 mol) was immediately used for the next step. To the **P1** dissolved in CH<sub>2</sub>Cl<sub>2</sub> (90 mL) were added HC(OEt)<sub>3</sub> (1.35 mL, 12.39 mmol) and sulfamic acid (27.5 mg). The mixture was stirred for 3 hours and powder precipitate formed. Solvent was evaporated and the residue was rinsed with ether. After drying under air, **P2** was obtained as a white powder in 67% yield.

<sup>1</sup>H NMR (400 MHz, DMSO-*d*<sub>6</sub>) δ 8.41 (s, 1H), 7.38 (s, 2H).

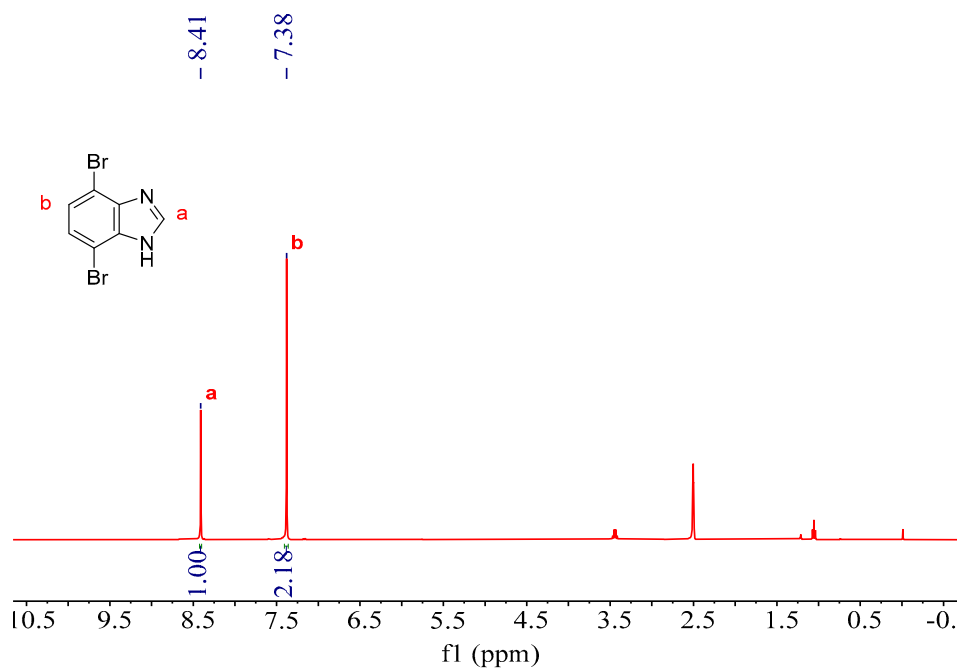

**5,6-Dibromo-1-methyl-1*H*-Benzimidazole (P3).** To a 250 mL flask were added **P2** (1.97 g, 7.14 mmol), K<sub>2</sub>CO<sub>3</sub> (2.96 g, 21.4 mmol) and EtOH (50 mL). The mixture was heated to 50 °C. To the hot mixture, MeI (1.0 mL, 16.2 mmol) was added dropwise and the mixture was maintained at reflux for 3 h. After consumption of **P2** was confirmed by TLC analysis, the mixture was cooled to room temperature. After addition of water (20 mL) and evaporation of EtOH, the powdered precipitate was collected, washed with water and hexane/Et<sub>2</sub>O (1/1) successively, and dried under vacuum at 60 °C to produce **P3** as a yellow powder in 86% yield.

<sup>1</sup>H NMR (400 MHz, DMSO-*d*<sub>6</sub>) δ 8.36 (s, 1H), 7.37 (s, 2H), 4.09 (s, 3H).

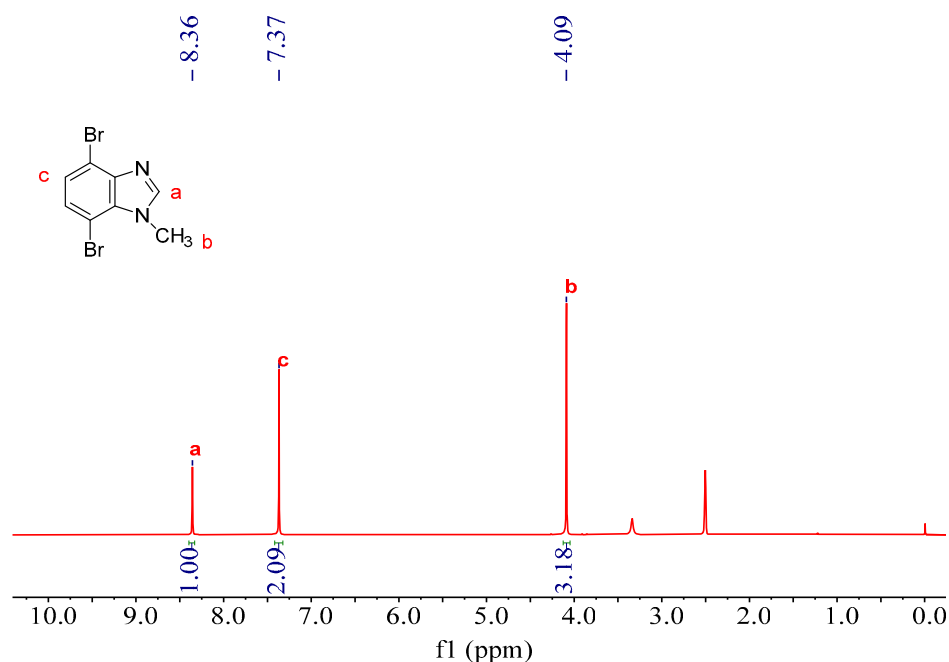

**5,6-Bis(4-formylbenzyl)-1-methyl-1*H*-benzimidazole (IM).** To a 500 mL three-neck bound bottle flask were added **P3** (1.93 g, 6.67 mmol), 4-(4,4,5,5-tetramethyl-1,3,2-dioxaborolan-2-yl)benzaldehyde (4.67 g, 15.35 mmol), Pd(PPh<sub>3</sub>)<sub>4</sub> (385 mg, 0.33 mmol) and K<sub>2</sub>CO<sub>3</sub> (2.76 g, 20 mmol) in 50 mL of 1,4-dioxane and 12 mL of water with vigorous stirring under N<sub>2</sub> protection. The reaction was heated to 100 °C overnight under nitrogen atmosphere. The color of the reaction was changed from slight yellow to dark brown. The mixture was cooled to room temperature. Water was added and organic compounds were extracted with ethyl acetate three times. The combined organic layer was washed with brine and dried over anhydrous MgSO<sub>4</sub>. The extract was

filtered through short pad basic aluminum oxide and evaporated. The obtained residue was rinsed with hexane/Et<sub>2</sub>O (2/1) to give **IM** as a brown powder (65% yield).

<sup>1</sup>H NMR (400 MHz, CDCl<sub>3</sub>) δ 10.14 (s, 1H), 10.09 (s, 1H), 8.21 (d, *J* = 8.1 Hz, 2H), 8.03 (d, *J* = 11.6 Hz, 4H), 7.93 (s, 1H), 7.67 (d, *J* = 8.0 Hz, 2H), 7.54 (d, *J* = 7.7 Hz, 1H), 7.27 (s, 1H), 3.46 (s, 3H).

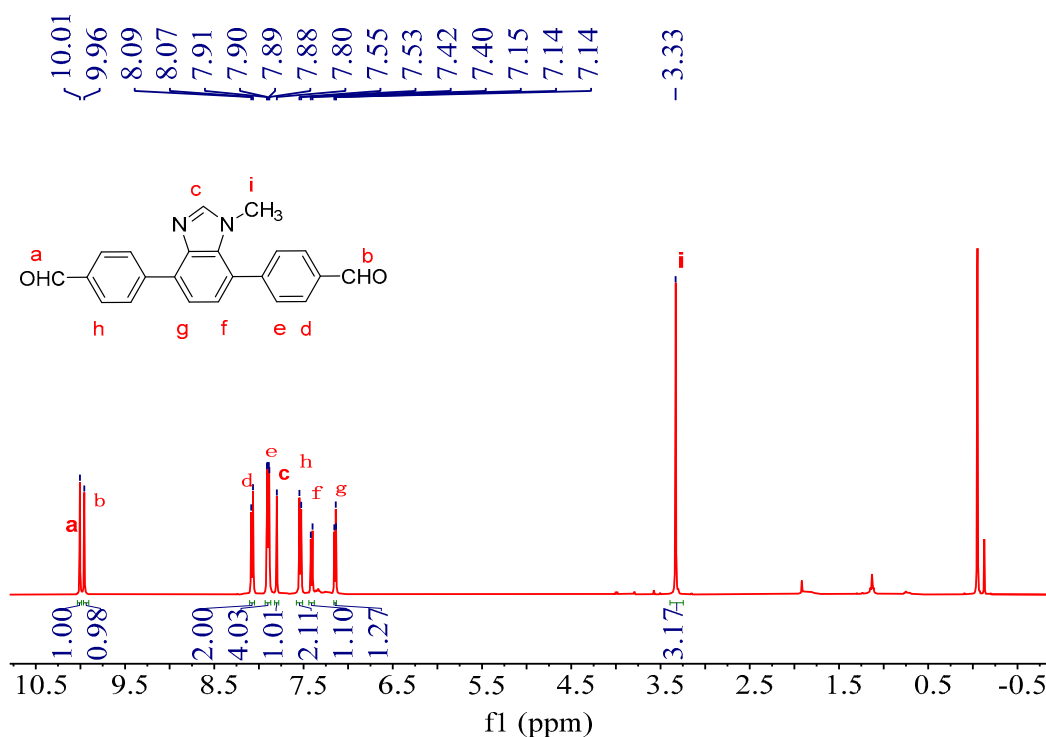

#### Synthesis of 2'3'5'6'-tetrafluoro-[1,1':4',1''-terphenyl]-4,4'-dicarbaldehyde (**4F**)

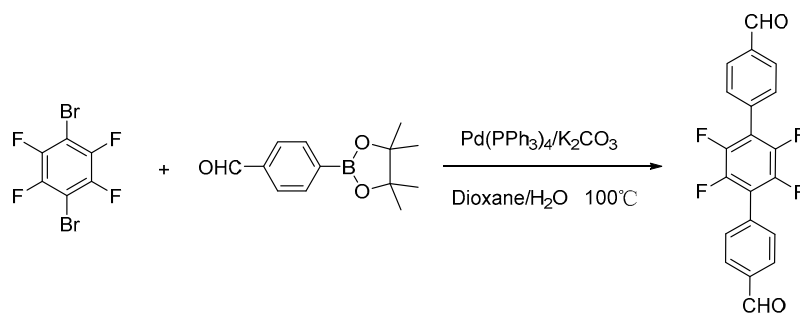

**4F** was synthesized according to a literature method with modification [55]. To a 500 mL three-neck round bottle flask were added 1,4-dibromotetrafluorobenzene (1.65 g, 5.36 mmol), K<sub>2</sub>CO<sub>3</sub> (2.63 g, 19.0 mmol), 4-formylphenylboronic acid pinacol cyclic ester (3.36 g, 14.48 mmol) and palladium tetrakis(triphenylphosphine) (0.35 g, 0.30

mmol). The air in the flask was slowly removed by N<sub>2</sub> flow and a mixture of dioxane (50 mL) and H<sub>2</sub>O (12 mL) was added to the flask under N<sub>2</sub> protection. The reaction was stirred under reflux (100 °C) under N<sub>2</sub> environment for 24 hours. After cooling to room temperature, solid was precipitated and separated by filtration. The solid was washed by water, ethyl acetate, and ethanol, successively. After drying at 80 °C under vacuum overnight, a white solid product **4F** was obtained in 80% yield.

<sup>1</sup>H NMR (400 MHz, CDCl<sub>3</sub>) δ 10.12 (s, 2H), 8.06 (d, J = 8.4 Hz, 4H), 7.73 (d, J = 8.0 Hz, 4H).

<sup>13</sup>C NMR (100 MHz, DMSO-*d*<sub>6</sub>) δ 192.87, 136.61, 135.59, 134.04, 132.37, 130.99, 129.79.

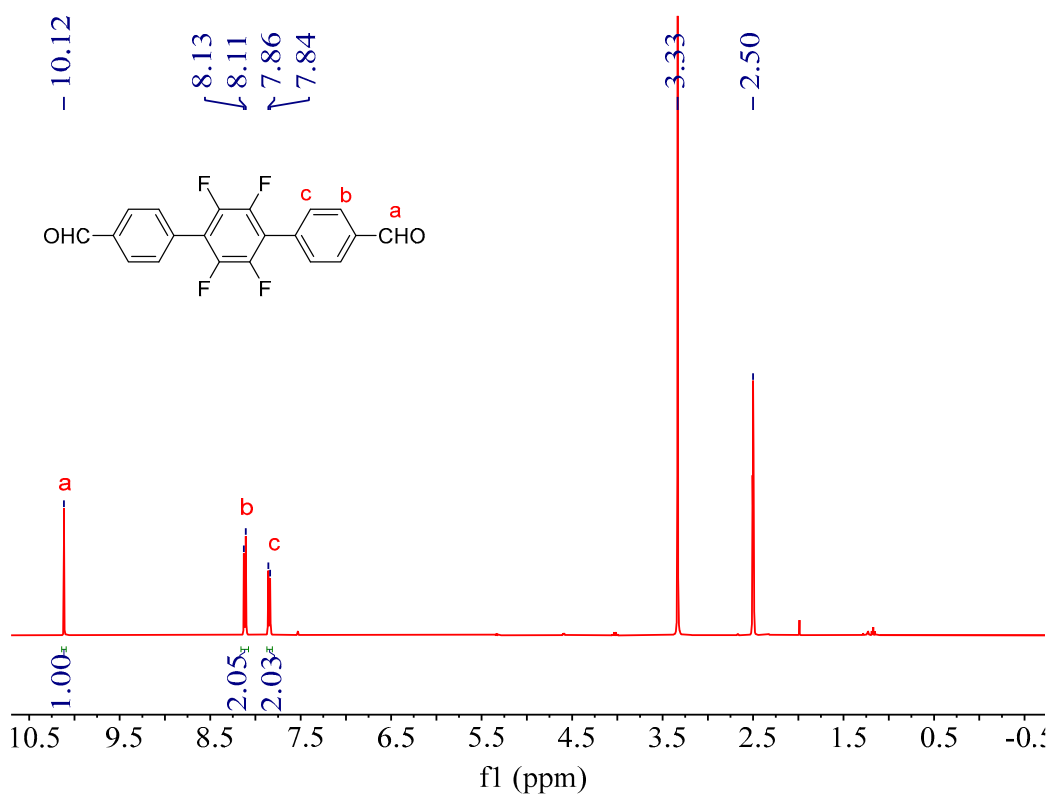

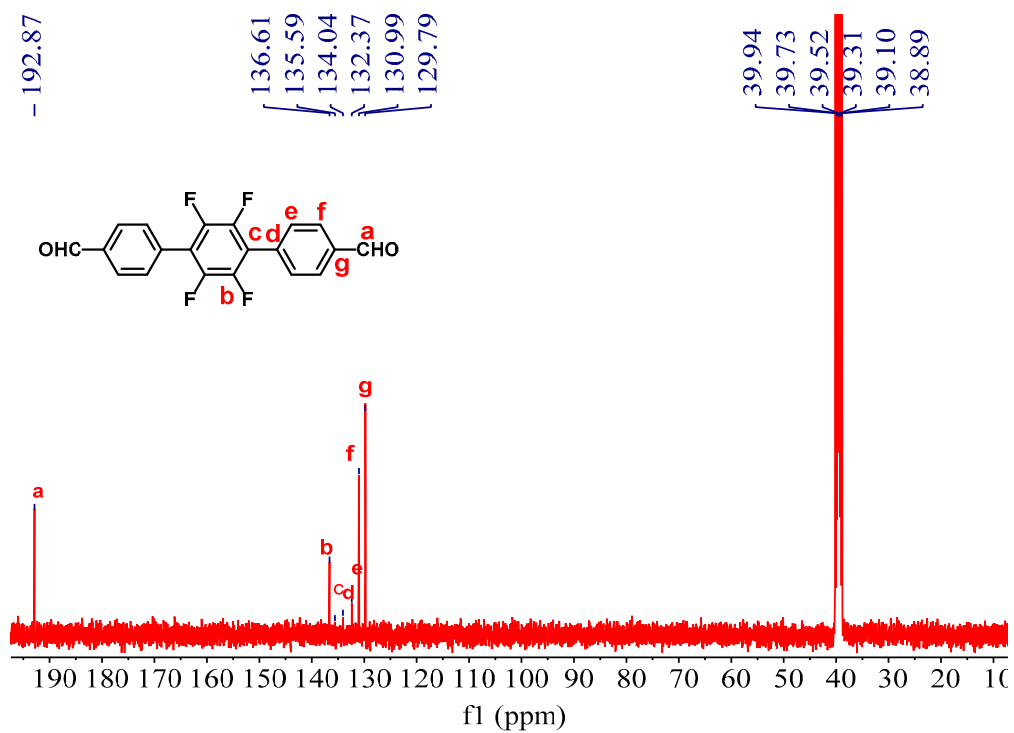



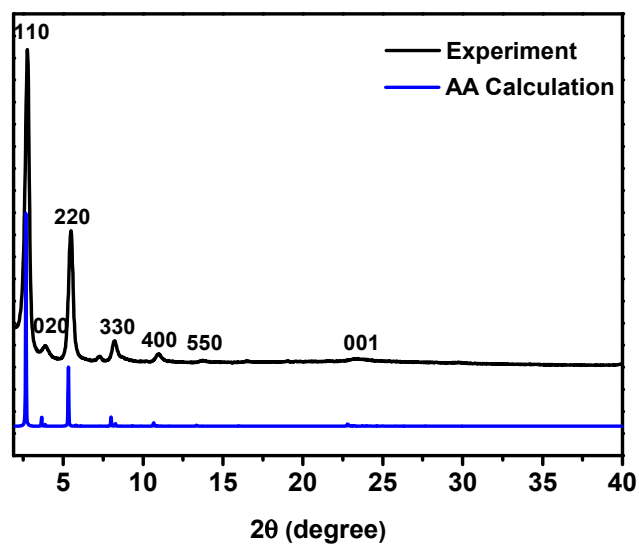

**Figure S1.** PXRD pattern of BMIM4F-Py-COF. Experimental pattern (black) and AA-stacking (blue).

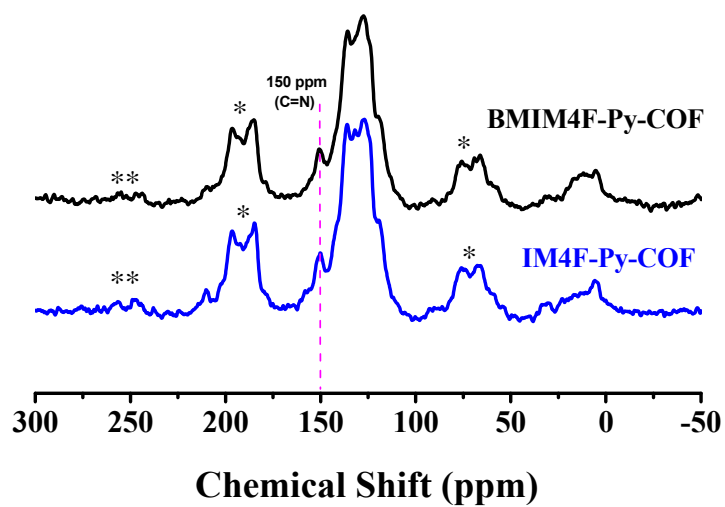

**Figure S2.** Solid-state  $^{13}\text{C}$  NMR spectra of IM4F-Py-COF (blue) and BMIM4F-Py-COF (black).

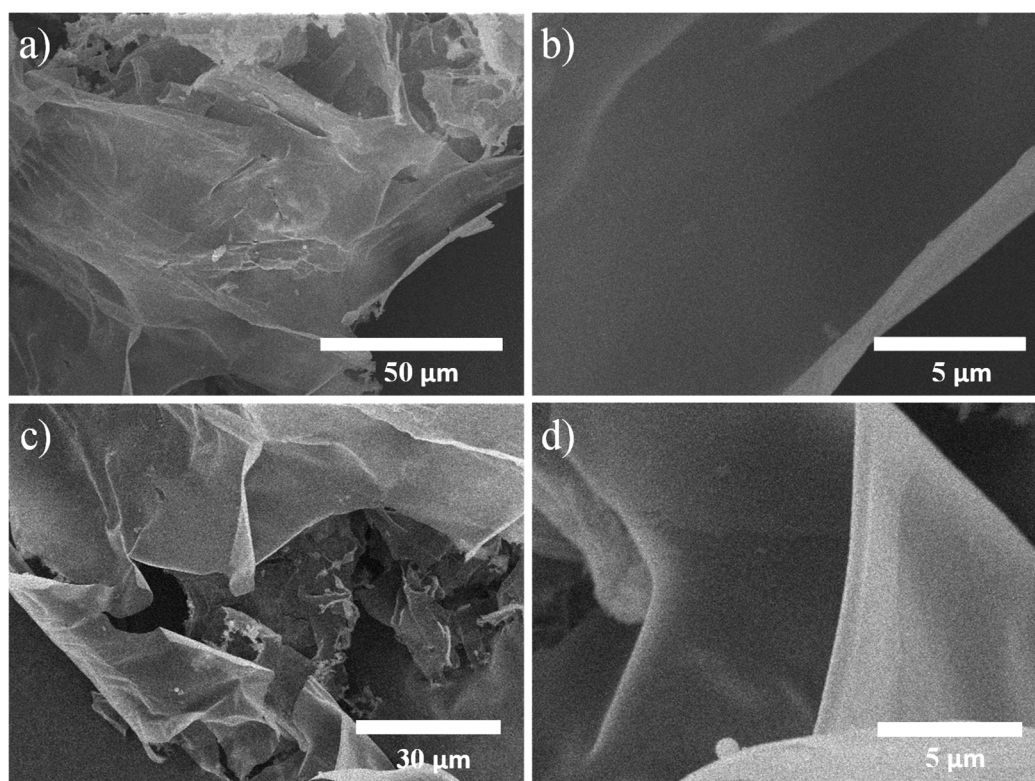

**Figure S3.** FE-SEM images of IM4F-Py-COF (a,b) and BMIM4F-Py-COF (c,d).

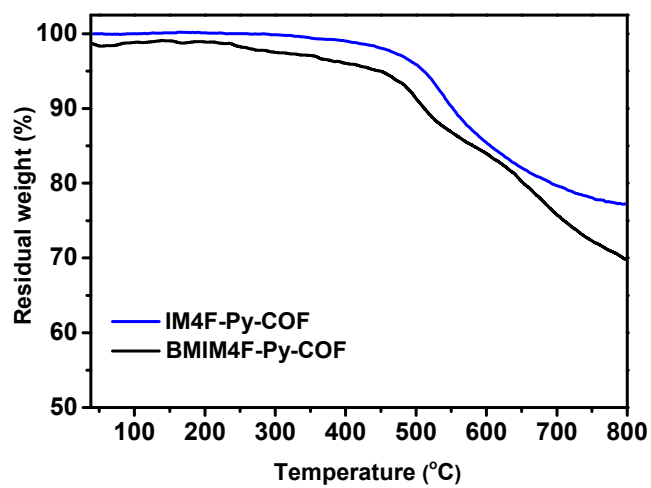

**Figure S4.** Thermogravimetric analysis of IM4F-Py-COF (blue) and BMIM4F-Py-COF (black).

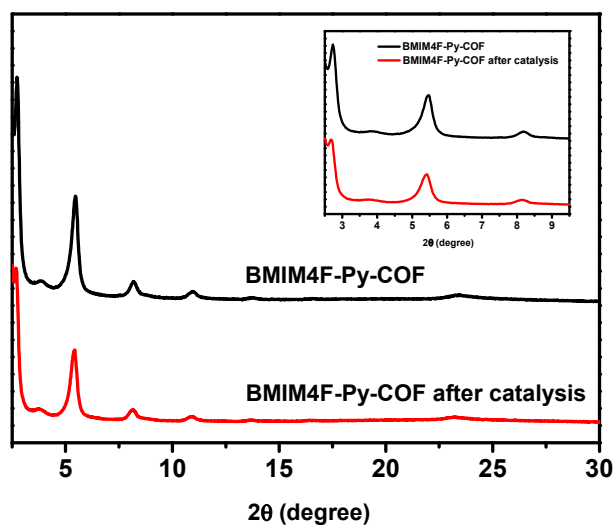

**Figure S5.** Comparison of PXRD pattern of BMIM4F-Py-COF before (black) and after catalysis (red). The insert indicates an enlarged PXRD pattern.

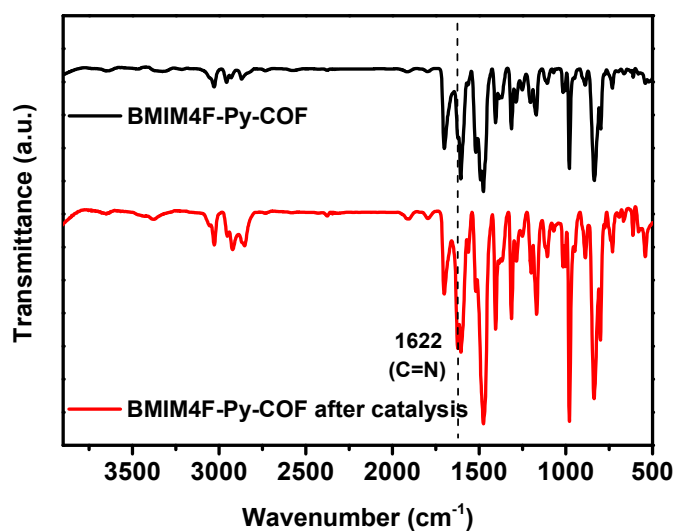

**Figure S6.** Comparison of FT-IR spectroscopy of BMIM4F-Py-COF before (black) and after catalysis (red).

**Table S1.** Fractional atomic coordinates for the unit cell of IM4F-Py-COF.

| Triclinic P1                                                                                                  |         |         |         |      |         |         |         |
|---------------------------------------------------------------------------------------------------------------|---------|---------|---------|------|---------|---------|---------|
| a = 49.83 Å, b = 42.59 Å, c = 3.93 Å; $\alpha = 89.50^\circ$ , $\beta = 88.71^\circ$ , $\gamma = 90.06^\circ$ |         |         |         |      |         |         |         |
| atom                                                                                                          | x       | y       | z       | atom | x       | y       | z       |
| C1                                                                                                            | 0.17137 | 0.3325  | 0.43195 | N141 | 0.87962 | 0.36    | 0.4616  |
| C2                                                                                                            | 0.14814 | 0.31593 | 0.53614 | C142 | 0.87981 | 0.32987 | 0.4135  |
| C3                                                                                                            | 0.15022 | 0.28399 | 0.62232 | H143 | 0.93161 | 0.47572 | 0.68483 |
| C4                                                                                                            | 0.02362 | 0.43703 | 0.52968 | H144 | 0.92779 | 0.5587  | 0.18003 |
| C5                                                                                                            | 0.02361 | 0.47017 | 0.56812 | H145 | 0.88675 | 0.59063 | 0.17662 |
| C6                                                                                                            | 0.04726 | 0.48723 | 0.62198 | H146 | 0.92489 | 0.65984 | 0.79006 |
| C7                                                                                                            | 0.04851 | 0.41739 | 0.51635 | H147 | 0.965   | 0.62699 | 0.82272 |
| C8                                                                                                            | 0.07119 | 0.58051 | 0.3033  | C148 | 0.801   | 0.72269 | 0.47991 |
| C9                                                                                                            | 0.09442 | 0.59894 | 0.29028 | C149 | 0.77481 | 0.73897 | 0.48389 |
| C10                                                                                                           | 0.09539 | 0.62757 | 0.45996 | C150 | 0.7716  | 0.76734 | 0.65831 |
| C11                                                                                                           | 0.0726  | 0.63759 | 0.64678 | C151 | 0.82474 | 0.73929 | 0.40317 |
| C12                                                                                                           | 0.04962 | 0.6187  | 0.6681  | C152 | 0.80236 | 0.6905  | 0.55485 |
| N13                                                                                                           | 0.11904 | 0.36079 | 0.46951 | C153 | 0.75296 | 0.72597 | 0.31604 |
| C14                                                                                                           | 0.12173 | 0.33153 | 0.55973 | H154 | 0.86764 | 0.73715 | 0.34334 |
| H15                                                                                                           | 0.06612 | 0.47574 | 0.66753 | H155 | 0.82777 | 0.65022 | 0.61293 |
| H16                                                                                                           | 0.0707  | 0.55927 | 0.15606 | H156 | 0.82371 | 0.76418 | 0.34184 |
| H17                                                                                                           | 0.11167 | 0.59141 | 0.14001 | H157 | 0.78404 | 0.67764 | 0.61843 |
| H18                                                                                                           | 0.07254 | 0.65927 | 0.78621 | F158 | 0.79243 | 0.77809 | 0.84612 |
| H19                                                                                                           | 0.03275 | 0.6264  | 0.82471 | F159 | 0.75712 | 0.69979 | 0.123   |
| C20                                                                                                           | 0.20237 | 0.71582 | 0.45558 | H160 | 0.89856 | 0.31772 | 0.36227 |
| C21                                                                                                           | 0.22924 | 0.73047 | 0.42588 | C161 | 0.33118 | 0.82322 | 0.56917 |
| C22                                                                                                           | 0.23254 | 0.76111 | 0.29569 | C162 | 0.35451 | 0.812   | 0.40498 |
| C23                                                                                                           | 0.18075 | 0.73222 | 0.60411 | C163 | 0.35362 | 0.78329 | 0.23423 |
| C24                                                                                                           | 0.19823 | 0.68528 | 0.3364  | C164 | 0.4743  | 0.93698 | 0.53173 |
| C25                                                                                                           | 0.25221 | 0.71458 | 0.52995 | C165 | 0.47428 | 0.97013 | 0.57209 |
| H26                                                                                                           | 0.13919 | 0.73095 | 0.75928 | C166 | 0.45056 | 0.98719 | 0.63263 |
| H27                                                                                                           | 0.17009 | 0.64774 | 0.27165 | C167 | 0.44939 | 0.91731 | 0.51651 |
| H28                                                                                                           | 0.18363 | 0.75568 | 0.70077 | C168 | 0.42721 | 0.08017 | 0.3216  |
| H29                                                                                                           | 0.21461 | 0.67247 | 0.21651 | C169 | 0.40395 | 0.09846 | 0.31476 |
| H30                                                                                                           | 0.21535 | 0.77422 | 0.20861 | C170 | 0.40304 | 0.12756 | 0.47483 |
| N31                                                                                                           | 0.25304 | 0.68509 | 0.70083 | C171 | 0.42551 | 0.13795 | 0.65137 |
| H32                                                                                                           | 0.10469 | 0.31782 | 0.64928 | C172 | 0.4484  | 0.11907 | 0.67041 |
| C33                                                                                                           | 0.67137 | 0.8325  | 0.43461 | N173 | 0.37961 | 0.86001 | 0.45914 |
| C34                                                                                                           | 0.64814 | 0.81594 | 0.53872 | C174 | 0.3798  | 0.82988 | 0.4109  |
| C35                                                                                                           | 0.65021 | 0.78401 | 0.62512 | H175 | 0.43159 | 0.97572 | 0.68322 |
| C36                                                                                                           | 0.52361 | 0.93703 | 0.52961 | H176 | 0.42782 | 0.05869 | 0.17848 |
| C37                                                                                                           | 0.5236  | 0.97017 | 0.56803 | H177 | 0.38677 | 0.09062 | 0.17448 |
| C38                                                                                                           | 0.54724 | 0.98722 | 0.62228 | H178 | 0.42487 | 0.15986 | 0.78801 |

|     |         |         |         |      |         |         |         |
|-----|---------|---------|---------|------|---------|---------|---------|
| C39 | 0.5485  | 0.91739 | 0.51677 | H179 | 0.46498 | 0.12701 | 0.82132 |
| C40 | 0.5712  | 0.08051 | 0.30392 | C180 | 0.30101 | 0.22269 | 0.47673 |
| C41 | 0.59444 | 0.09894 | 0.29131 | C181 | 0.27482 | 0.23897 | 0.48069 |
| C42 | 0.5954  | 0.12756 | 0.4612  | C182 | 0.27161 | 0.26734 | 0.65513 |
| C43 | 0.57259 | 0.13757 | 0.64777 | C183 | 0.32474 | 0.23928 | 0.40006 |
| C44 | 0.5496  | 0.11869 | 0.66867 | C184 | 0.30236 | 0.19049 | 0.55172 |
| N45 | 0.61904 | 0.86078 | 0.4713  | C185 | 0.25296 | 0.22597 | 0.31284 |
| C46 | 0.62173 | 0.83154 | 0.56194 | H186 | 0.36764 | 0.23714 | 0.34046 |
| H47 | 0.56609 | 0.97573 | 0.66813 | H187 | 0.32776 | 0.15021 | 0.60998 |
| H48 | 0.57073 | 0.05927 | 0.15657 | H188 | 0.32372 | 0.26418 | 0.33872 |
| H49 | 0.6117  | 0.09141 | 0.14123 | H189 | 0.28404 | 0.17763 | 0.61524 |
| H50 | 0.57252 | 0.15925 | 0.7873  | F190 | 0.29244 | 0.27809 | 0.84296 |
| H51 | 0.53273 | 0.12637 | 0.82507 | F191 | 0.25712 | 0.19979 | 0.11979 |
| C52 | 0.70239 | 0.21578 | 0.45857 | H192 | 0.39855 | 0.81773 | 0.35978 |
| C53 | 0.72925 | 0.23045 | 0.42901 | C193 | 0.17289 | 0.67127 | 0.36706 |
| C54 | 0.73255 | 0.26109 | 0.29888 | C194 | 0.15133 | 0.68751 | 0.52017 |
| C55 | 0.68076 | 0.23218 | 0.60705 | C195 | 0.15547 | 0.7181  | 0.63811 |
| C56 | 0.69825 | 0.18525 | 0.33922 | C196 | 0.02373 | 0.5701  | 0.52077 |
| C57 | 0.75222 | 0.21456 | 0.53309 | C197 | 0.02366 | 0.53693 | 0.56371 |
| H58 | 0.63919 | 0.2309  | 0.76193 | C198 | 0.04728 | 0.51984 | 0.61961 |
| H59 | 0.67011 | 0.14772 | 0.27405 | C199 | 0.0487  | 0.58966 | 0.50033 |
| H60 | 0.68363 | 0.25564 | 0.70385 | C200 | 0.07119 | 0.42631 | 0.31945 |
| H61 | 0.71464 | 0.17245 | 0.21937 | C201 | 0.09424 | 0.4076  | 0.31185 |
| H62 | 0.71536 | 0.2742  | 0.21179 | C202 | 0.09475 | 0.37889 | 0.48584 |
| N63 | 0.75305 | 0.18506 | 0.7039  | C203 | 0.07188 | 0.36931 | 0.67568 |
| H64 | 0.60469 | 0.81784 | 0.65155 | C204 | 0.0491  | 0.38844 | 0.69157 |
| C65 | 0.8271  | 0.67504 | 0.55202 | N205 | 0.11999 | 0.6452  | 0.4373  |
| C66 | 0.8509  | 0.69166 | 0.47652 | C206 | 0.12459 | 0.67281 | 0.56208 |
| C67 | 0.84955 | 0.72391 | 0.40336 | H207 | 0.06617 | 0.5313  | 0.66325 |
| C68 | 0.97441 | 0.5701  | 0.52606 | H208 | 0.07098 | 0.44754 | 0.16758 |
| C69 | 0.97435 | 0.53692 | 0.56979 | H209 | 0.11165 | 0.41487 | 0.16121 |
| C70 | 0.95061 | 0.5198  | 0.63267 | H210 | 0.07178 | 0.34788 | 0.82396 |
| C71 | 0.9495  | 0.58969 | 0.50977 | H211 | 0.03214 | 0.38104 | 0.84992 |
| C72 | 0.92706 | 0.42687 | 0.33047 | C212 | 0.19829 | 0.28551 | 0.50525 |
| C73 | 0.90398 | 0.40821 | 0.32115 | C213 | 0.22463 | 0.26964 | 0.49476 |
| C74 | 0.90342 | 0.37872 | 0.47833 | C214 | 0.22781 | 0.24126 | 0.32131 |
| C75 | 0.92585 | 0.36839 | 0.65649 | C215 | 0.1751  | 0.26886 | 0.60505 |
| C76 | 0.94847 | 0.38766 | 0.68004 | C216 | 0.19628 | 0.31739 | 0.41829 |
| N77 | 0.87865 | 0.64533 | 0.46801 | C217 | 0.2465  | 0.28275 | 0.6611  |
| C78 | 0.87718 | 0.67576 | 0.47755 | H218 | 0.13263 | 0.27077 | 0.70445 |
| H79 | 0.93166 | 0.53122 | 0.68294 | H219 | 0.17019 | 0.35711 | 0.36281 |
| H80 | 0.92754 | 0.44859 | 0.18761 | H220 | 0.17663 | 0.24415 | 0.67304 |
| H81 | 0.88682 | 0.41599 | 0.17916 | H221 | 0.21422 | 0.3303  | 0.33899 |

|      |         |         |         |      |          |         |         |
|------|---------|---------|---------|------|----------|---------|---------|
| H82  | 0.92536 | 0.34598 | 0.78806 | F222 | 0.20677  | 0.23018 | 0.13998 |
| H83  | 0.96504 | 0.37966 | 0.83173 | F223 | 0.24229  | 0.30897 | 0.85302 |
| C84  | 0.80675 | 0.27639 | 0.40703 | H224 | 0.10914  | 0.68565 | 0.69841 |
| C85  | 0.78111 | 0.25885 | 0.39295 | C225 | 0.67291  | 0.17124 | 0.36961 |
| C86  | 0.77746 | 0.22746 | 0.50749 | C226 | 0.65134  | 0.18748 | 0.52265 |
| C87  | 0.82965 | 0.26625 | 0.22791 | C227 | 0.65548  | 0.21806 | 0.6408  |
| C88  | 0.80756 | 0.30545 | 0.57337 | C228 | 0.52373  | 0.07009 | 0.52068 |
| C89  | 0.75809 | 0.27514 | 0.28352 | C229 | 0.52365  | 0.03692 | 0.56361 |
| H90  | 0.87118 | 0.27465 | 0.10008 | C230 | 0.54727  | 0.01983 | 0.6199  |
| H91  | 0.83156 | 0.3453  | 0.70636 | C231 | 0.5487   | 0.08965 | 0.50071 |
| H92  | 0.82869 | 0.24544 | 0.07622 | C232 | 0.5712   | 0.9263  | 0.32012 |
| H93  | 0.78991 | 0.31429 | 0.70617 | C233 | 0.59425  | 0.90759 | 0.31295 |
| N94  | 0.79576 | 0.20568 | 0.65962 | C234 | 0.59474  | 0.87889 | 0.48716 |
| H95  | 0.75985 | 0.29907 | 0.19008 | C235 | 0.57185  | 0.86932 | 0.67675 |
| H96  | 0.89525 | 0.68994 | 0.47427 | C236 | 0.54908  | 0.88845 | 0.69218 |
| C97  | 0.3271  | 0.17504 | 0.54902 | N237 | 0.62     | 0.14518 | 0.43897 |
| C98  | 0.35091 | 0.19165 | 0.47363 | C238 | 0.6246   | 0.17278 | 0.56421 |
| C99  | 0.34956 | 0.22391 | 0.4004  | H239 | 0.56616  | 0.03129 | 0.66384 |
| C100 | 0.47441 | 0.0701  | 0.52509 | H240 | 0.571    | 0.94752 | 0.16813 |
| C101 | 0.47434 | 0.03692 | 0.56884 | H241 | 0.61167  | 0.91485 | 0.1625  |
| C102 | 0.45059 | 0.0198  | 0.63135 | H242 | 0.57175  | 0.84789 | 0.82517 |
| C103 | 0.4495  | 0.08969 | 0.50835 | H243 | 0.5321   | 0.88105 | 0.85032 |
| C104 | 0.42707 | 0.92688 | 0.3288  | C244 | 0.69829  | 0.78552 | 0.50831 |
| C105 | 0.40399 | 0.90822 | 0.31915 | C245 | 0.72463  | 0.76965 | 0.49791 |
| C106 | 0.40342 | 0.87873 | 0.47618 | C246 | 0.72781  | 0.74126 | 0.32448 |
| C107 | 0.42584 | 0.86838 | 0.65452 | C247 | 0.6751   | 0.76887 | 0.60808 |
| C108 | 0.44845 | 0.88765 | 0.67844 | C248 | 0.69629  | 0.8174  | 0.42119 |
| N109 | 0.37865 | 0.14533 | 0.46555 | C249 | 0.7465   | 0.78275 | 0.66424 |
| C110 | 0.37719 | 0.17576 | 0.47491 | H250 | 0.63262  | 0.77079 | 0.7072  |
| H111 | 0.43164 | 0.03121 | 0.68134 | H251 | 0.6702   | 0.85712 | 0.36531 |
| H112 | 0.42756 | 0.9486  | 0.18603 | H252 | 0.67662  | 0.74416 | 0.67619 |
| H113 | 0.38684 | 0.91601 | 0.17701 | H253 | 0.71422  | 0.8303  | 0.34193 |
| H114 | 0.42533 | 0.84597 | 0.78598 | F254 | 0.70677  | 0.73018 | 0.14312 |
| H115 | 0.46501 | 0.87965 | 0.83032 | F255 | 0.74229  | 0.80898 | 0.8561  |
| C116 | 0.30674 | 0.77642 | 0.40389 | H256 | 0.60914  | 0.1856  | 0.70065 |
| C117 | 0.2811  | 0.75888 | 0.38975 | C257 | -0.00103 | 0.48681 | 0.56589 |
| C118 | 0.27745 | 0.72748 | 0.50431 | C258 | -0.00098 | 0.42149 | 0.4979  |
| C119 | 0.32964 | 0.76628 | 0.22484 | H259 | -0.00086 | 0.39658 | 0.44522 |
| C120 | 0.30755 | 0.80548 | 0.57027 | C260 | 0.49896  | 0.9868  | 0.56535 |
| C121 | 0.25808 | 0.77516 | 0.2803  | C261 | 0.49901  | 0.92149 | 0.49738 |
| H122 | 0.37118 | 0.77467 | 0.09724 | H262 | 0.49914  | 0.89657 | 0.44471 |
| H123 | 0.33154 | 0.84532 | 0.70347 | C263 | -0.00101 | 0.52027 | 0.56403 |
| H124 | 0.32869 | 0.74546 | 0.07312 | C264 | -0.00087 | 0.58566 | 0.48922 |

|      |         |         |         |  |      |          |         |         |
|------|---------|---------|---------|--|------|----------|---------|---------|
| H125 | 0.28989 | 0.81431 | 0.70301 |  | H265 | -0.00076 | 0.61062 | 0.43415 |
| N126 | 0.29575 | 0.70571 | 0.65647 |  | C266 | 0.49899  | 0.02027 | 0.5635  |
| H127 | 0.25984 | 0.79909 | 0.18685 |  | C267 | 0.49913  | 0.08566 | 0.48869 |
| H128 | 0.39525 | 0.18994 | 0.47172 |  | H268 | 0.49925  | 0.11062 | 0.43363 |
| C129 | 0.83119 | 0.3232  | 0.57212 |  | C269 | 0.27809  | 0.68088 | 0.77094 |
| C130 | 0.85452 | 0.31198 | 0.40782 |  | C270 | 0.32331  | 0.69877 | 0.5445  |
| C131 | 0.85363 | 0.28327 | 0.23715 |  | H271 | 0.28506  | 0.65977 | 0.89677 |
| C132 | 0.9743  | 0.43698 | 0.5327  |  | H272 | 0.32402  | 0.69423 | 0.26718 |
| C133 | 0.97429 | 0.47013 | 0.57305 |  | H273 | 0.33076  | 0.67734 | 0.67478 |
| C134 | 0.95057 | 0.48719 | 0.63396 |  | H274 | 0.33714  | 0.71806 | 0.60658 |
| C135 | 0.9494  | 0.41731 | 0.51794 |  | C275 | 0.7781   | 0.18085 | 0.77401 |
| C136 | 0.92719 | 0.58017 | 0.32324 |  | C276 | 0.82332  | 0.19875 | 0.54764 |
| C137 | 0.90393 | 0.59847 | 0.31674 |  | H277 | 0.78507  | 0.15974 | 0.89979 |
| C138 | 0.90303 | 0.62756 | 0.47696 |  | H278 | 0.82403  | 0.1942  | 0.27033 |
| C139 | 0.92552 | 0.63794 | 0.65331 |  | H279 | 0.83077  | 0.17732 | 0.67796 |
| C140 | 0.94841 | 0.61906 | 0.67199 |  | H280 | 0.83715  | 0.21804 | 0.60967 |

**Table S2.** Comparison with various metal-free catalysts in the performance of the cycloaddition of CO<sub>2</sub> to epichlorohydrin.

| Catalysts            | Temperature (°C) | Pressure (MPa) | Yield (%) | Ref       |
|----------------------|------------------|----------------|-----------|-----------|
| BMIM4F-Py-COF        | 110              | 4              | 97        | This work |
| BMIM4F-Py-COF        | 120              | 1              | 94        | This work |
| 2,3-DhaTph           | 110              | 0.1            | 88        | 67        |
| CTF-1                | 130              | 0.69           | 77        | 68        |
| CTF-1-HSA            | 130              | 0.69           | 96        | 69        |
| cCTF                 | 90               | 1              | 95        | 69        |
| PAD-3                | 110              | 1              | 99        | 70        |
| DVB-HTA              | 120              | 1.2            | 90        | 71        |
| DVB-BTA              | 120              | 1.2            | 84        | 71        |
| POM3-IM              | 120              | 1              | 90        | 72        |
| PRP-1+TBAB           | 60               | 0.1            | 89        | 73        |
| [PTPP]50%-TD-COF     | 100              | 1              | 99        | 74        |
| PIL-HPCOF-320–10–100 | 90               | 1              | 95        | 75        |
| IP-1                 | 100              | 0.1            | 76        | 76        |
| IP-2                 | 100              | 0.1            | 99        | 76        |
| IP-1                 | 80               | 0.1            | 52        | 76        |
| IP-2                 | 80               | 0.1            | 70        | 76        |
| COF-JLU7/TBAB        | 80               | 0.1            | 96        | 77        |
| DB10%-Pa-Tp          | 120              | 0.1            | 99        | 78        |
| COF-IL               | 80               | 0.1            | 98        | 79        |
| PAIL-1               | 25               | 0.5            | 10        | 80        |
| PAIL-2               | 25               | 0.5            | 22        | 80        |



|                       |     |      |    |    |
|-----------------------|-----|------|----|----|
| PAIL-3                | 25  | 0.5  | 41 | 80 |
| PAIL-3                | 80  | 0.5  | 99 | 80 |
| CTF-0-400-40-1        | 130 | 0.69 | <5 | 81 |
| CTF-0-400/600-20/20-5 | 130 | 0.69 | 93 | 81 |
| CTF-CSU1              | 25  | 0.1  | 78 | 82 |
| COF-JLU7              | 40  | 0.1  | 92 | 77 |
| OMe-OH-TPBP-COF       | 40  | 0.1  | 91 | 83 |
| COF-salen-Co          | 100 | 2    | 90 | 84 |
| DB10%-Pa-Tp           | 120 | 0.1  | 99 | 85 |
| COF-HNU3              | 100 | 2    | 96 | 86 |
| AMIMBr@H2P-DHP<br>COF | 120 | 1    | 91 | 58 |
| COF-HNU14             | 120 | 2    | 99 | 87 |
